# Supplementary material for: Integrated Multiclass Driver ctDNA Profiling Enables MPNST Detection and Monitoring in NF1 Patients
Source: Research Square preprint supplement (doi:10.21203/rs.3.rs-7330245/v1), 2025-09-30
Supplement: Supplementary file 1 [file 4ab815d50d64328873c981a8.xlsx]

## Sheet: SUPP_Data_1
Supplementary Table 1.Clinical Characteristics and Summary Statistics for All Patients in the Current Study
									Summary statistics for clinical cohorts in the current study
Participant ID	Sex	NF1 Clinical Status (NIH Criteria)	Age range (decade)	Disease status	Metastatic status	NF1 Germline Mutation Status	Tumor Site		Statistic	Healthy	Plexiform	MPNST
Pat001	Female	Yes	30-39	Plex	NA	SNV	Head/Neck		Cohort Size	24 (12 for Panel of Normal Generation)	44	26
Pat002	Male	Yes	20-29	Plex	NA	SNV	Multi Site		Sex (% Female)	0.458	0.523	0.461
Pat003	Male	Yes	20-29	Plex	NA	SNV	Multi Site		NF1 status (% NIH clinical criteria positive)	Not applicable	97.7%	0.5
Pat004	Female	Yes	30-39	Plex	NA	SNV	Multi Site		Mean age (years)	38	35.3	40.2
Pat005	Male	Yes	20-29	Plex	NA	SNV	Multi Site		Median age (years)	36	33.5	40
Pat006	Female	Yes	60-69	Plex	NA	Not Detected	Chest		Age range (years)	19 to 68	12 to 66	17 to 72
Pat007	Male	Yes	20-29	Plex	NA	Not Detected	Multi Site		Percentage metastatic (MPNST only)	Not Applicable	Not Applicable	61.5
Pat008	Female	Yes	40-49	Plex	NA	SNV	Multi Site		NF1 mutation detected (% SNV or microdeletion)	Not Applicable	72.7%	0.5
Pat009	Female	Yes	30-39	Plex	NA	SNV	Multi Site		Tumor Site - Abdomen	Not Applicable	6	7
Pat010	Male	Yes	60-69	Plex	NA	Not Detected	Chest		Tumor Site - Chest	Not Applicable	4	3
Pat011	Female	Yes	30-39	MPNST	Metastatic	SNV	Extremity		Tumor Site - Extremity	Not Applicable	11	2
Pat012	Female	No	40-49	MPNST	Metastatic	Not Detected	Multi Site		Tumor Site - Head/Neck	Not Applicable	8	4
Pat013	Male	Yes	50-59	Plex	NA	SNV	Extremity		Tumor Site - Multi Site	Not Applicable	15	11
Pat014	Male	Yes	20-29	MPNST	Metastatic	Not Detected	Multi Site
Pat016	Female	No	50-59	MPNST	Metastatic	SNV	Abdomen
Pat017	Male	Yes	10-19	MPNST	Metastatic	SNV	Chest
Pat018	Female	No	30-39	MPNST	Metastatic	Not Detected	Chest
Pat020	Female	Yes	40-49	MPNST	Local	SNV	Abdomen
Pat021	Male	Yes	40-49	MPNST	Metastatic	SNV	Multi Site
Pat022	Female	No	50-59	MPNST	Metastatic	Not Detected	Extremity
Pat023	Male	Yes	30-39	Plex	NA	SNV	Abdomen
Pat024	Female	Yes	20-29	Plex	NA	Not Detected	Multi Site
Pat025	Female	Yes	40-49	Plex	NA	Not Detected	Head/Neck
Pat026	Male	Indeterminate	60-69	Plex	NA	SNV	Multi Site
Pat027	Male	Yes	30-39	MPNST	Metastatic	SNV	Multi Site
Pat028	Female	Yes	40-49	Plex	NA	Not Detected	Abdomen
Pat029	Male	Yes	20-29	Plex	NA	SNV	Chest
Pat030	Male	Yes	30-39	Plex	NA	SNV	Multi Site
Pat031	Male	Yes	20-29	Plex	NA	SNV	Multi Site
Pat032	Female	Yes	60-69	Plex	NA	SNV	Extremity
Pat033	Female	Yes	60-69	Plex	NA	Not Detected	Head/Neck
Pat034	Male	No	70-79	MPNST	Metastatic	Not Detected	Multi Site
Pat035	Male	No	50-59	MPNST	Local	Not Detected	Abdomen
Pat036	Male	No	40-49	MPNST	Local	Not Detected	Abdomen
Pat037	Female	No	40-49	MPNST	Metastatic	Not Detected	Multi Site
Pat038	Male	Yes	40-49	Plex	NA	Not Detected	Head/Neck
Pat039	Female	Yes	30-39	Plex	NA	Not Detected	Head/Neck
Pat040	Female	No	40-49	MPNST	Local	Not Detected	Extremity
Pat041	Male	Yes	20-29	Plex	NA	SNV	Extremity
Pat042	Male	Yes	30-39	MPNST	Metastatic	SNV	Abdomen
Pat043	Female	Yes	10-19	Plex	NA	SNV	Multi Site
Pat044	Male	Yes	30-39	Plex	NA	SNV	Head/Neck
Pat046	Female	Yes	20-29	MPNST	Metastatic	Microdeletion	Multi Site
Pat047	Male	Yes	30-39	Plex	NA	Not Detected	Extremity
Pat048	Male	Yes	10-19	Plex	NA	SNV	Extremity
Pat049	Female	Yes	10-19	Plex	NA	Not Detected	Extremity
Pat050	Male	Yes	50-59	MPNST	Local	SNV	Abdomen
Pat051	Female	Yes	50-59	Plex	NA	SNV	Abdomen
Pat052	Female	Yes	30-39	Plex	NA	SNV	Head/Neck
Pat053	Male	Yes	50-59	MPNST	Local	SNV	Abdomen
Pat054	Male	No	10-19	MPNST	Local	Not Detected	Head/Neck
Pat055	Female	Yes	40-49	MPNST	Local	Not Detected	Chest
Pat056	Male	No	30-39	MPNST	Metastatic	SNV	Multi Site
Pat057	Male	Yes	20-29	Plex	NA	SNV	Abdomen
Pat059	Female	No	60-69	MPNST	Local	Not Detected	Head/Neck
Pat060	Male	No	20-29	MPNST	Metastatic	Not Detected	Multi Site
Pat061	Male	Yes	50-59	MPNST	Metastatic	Microdeletion	Multi Site
Pat062	Male	Yes	50-59	Plex	NA	SNV	Extremity
Pat063	Female	Yes	40-49	Plex	NA	SNV	Head/Neck
Pat064	Female	Yes	20-29	Plex	NA	SNV	Extremity
Pat065	Female	Yes	20-29	Plex	NA	SNV	Multi Site
Pat066	Female	Yes	20-29	Plex	NA	SNV	Chest
Pat067	Female	Yes	10-19	MPNST	Local	SNV	Head/Neck
Pat068	Female	Yes	30-39	Plex	NA	SNV	Extremity
Pat069	Female	Yes	20-29	Plex	NA	SNV	Multi Site
Pat070	Male	Yes	20-29	Plex	NA	SNV	Abdomen
Pat071	Male	Yes	20-29	Plex	NA	SNV	Head/Neck
Pat072	Female	Yes	30-39	Plex	NA	Not Detected	Multi Site
Pat073	Female	Yes	40-49	Plex	NA	SNV	Abdomen
Pat074	Male	Yes	20-29	Plex	NA	SNV	Multi Site
Pat075	Male	No	30-39	Healthy	NA	NA	NA
Pat076	Male	No	20-29	Healthy	NA	NA	NA
Pat077	Male	No	40-49	Healthy	NA	NA	NA
Pat078	Male	No	20-29	Healthy	NA	NA	NA
Pat079	Male	No	30-39	Healthy	NA	NA	NA
Pat080	Male	No	20-29	Healthy	NA	NA	NA
Pat081	Female	No	20-29	Healthy	NA	NA	NA
Pat082	Female	No	50-59	Healthy	NA	NA	NA
Pat083	Female	No	50-59	Healthy	NA	NA	NA
Pat084	Female	No	10-19	Healthy	NA	NA	NA
Pat085	Male	No	30-39	Healthy	NA	NA	NA
Pat086	Male	No	40-49	Healthy	NA	NA	NA
PoN001	Male	No	60-69	Healthy	NA	NA	NA
PoN002	Male	No	20-29	Healthy	NA	NA	NA
PoN003	Male	No	20-29	Healthy	NA	NA	NA
PoN004	Male	No	40-49	Healthy	NA	NA	NA
PoN005	Female	No	30-39	Healthy	NA	NA	NA
PoN006	Female	No	60-69	Healthy	NA	NA	NA
PoN007	Female	No	30-39	Healthy	NA	NA	NA
PoN008	Male	No	30-39	Healthy	NA	NA	NA
PoN009	Female	No	30-39	Healthy	NA	NA	NA
PoN010	Female	No	40-49	Healthy	NA	NA	NA
PoN011	Female	No	50-59	Healthy	NA	NA	NA
PoN012	Female	No	20-29	Healthy	NA	NA	NA
a. PoN, Panel of Normals: Unmatched healthy individuals used for error filtering and baseline generation in variant calling workflows (PACT, ichorCNA).
b. NF1 clinical status was determined using NIH diagnostic criteria for neurofibromatosis type 1; Indeterminate had multiple NF1 features but failed criteria.
c. Metastatic status indicates whether the patient had a primary or metastatic lesion during the course of the study.
d. NF1 mutation status determined by targeted sequencing; includes single nucleotide variants (SNVs) or microdeletions.
e. Not Detected refers to absence of detectable NF1 mutation by the applied sequencing panel.
f. NA indicates Not Applicable. NA is used throughout to denote fields that do not apply and are not relevant to a given sample or cohort.

## Sheet: SUPP_Data_2
Supplementary Table 2. Consolidated Targeted Genomic Regions (hg19) Included in the CAPP‑Seq Panel for Mutation and Copy Number Analysis
Chromosome	Start	End
chr1	1718772	1718876
chr1	1720491	1720708
chr1	1721833	1722035
chr1	1724683	1724750
chr1	1735857	1736020
chr1	1737913	1737977
chr1	1747194	1747301
chr1	1749275	1749314
chr1	1756835	1756892
chr2	25457150	25457289
chr2	25458575	25458694
chr2	25459804	25459874
chr2	25461998	25462084
chr2	25463170	25463319
chr2	25463508	25463599
chr2	25464430	25464576
chr2	25466766	25466851
chr2	25467023	25467207
chr2	25467408	25467521
chr2	25468121	25468201
chr2	25468888	25469178
chr2	25469488	25469645
chr2	25469919	25470027
chr2	25470459	25470618
chr2	25470905	25471121
chr2	25472525	25472593
chr2	25475062	25475066
chr2	25497809	25497956
chr2	25498368	25498412
chr2	25505259	25505580
chr2	25523007	25523112
chr2	25536781	25536853
chr2	198257029	198257185
chr2	198257695	198257912
chr2	198260779	198261052
chr2	198262708	198262840
chr2	198263184	198263305
chr2	198263692	198263752
chr2	198264778	198265158
chr2	198265438	198265660
chr2	198266123	198266249
chr2	198266465	198266854
chr2	198267279	198267550
chr2	198267672	198267759
chr2	198268308	198268488
chr2	198269799	198270196
chr2	198272721	198272843
chr2	198273092	198273305
chr2	198274493	198274731
chr2	198281464	198281635
chr2	198283232	198283312
chr2	198283658	198283675
chr2	198285104	198285266
chr2	198285752	198285857
chr2	198288531	198288698
chr2	198299695	198299723
chr3	38180191	38180519
chr3	38181354	38181489
chr3	38181878	38182083
chr3	38182247	38182339
chr3	38182622	38182774
chr3	142168273	142168444
chr3	142171969	142172075
chr3	142176445	142176597
chr3	142177799	142177953
chr3	142178068	142178225
chr3	142180781	142180932
chr3	142183938	142184082
chr3	142185165	142185375
chr3	142186775	142186910
chr3	142188178	142188411
chr3	142188927	142189025
chr3	142203981	142204124
chr3	142211973	142212153
chr3	142215202	142215362
chr3	142215854	142216034
chr3	142217438	142217616
chr3	142218468	142218560
chr3	142222203	142222295
chr3	142223980	142224145
chr3	142226772	142226951
chr3	142231101	142231312
chr3	142232342	142232480
chr3	142234236	142234357
chr3	142238510	142238626
chr3	142241569	142241683
chr3	142242834	142243041
chr3	142253921	142254047
chr3	142254949	142255043
chr3	142257323	142257467
chr3	142259745	142259876
chr3	142261506	142261599
chr3	142266566	142266752
chr3	142268320	142268515
chr3	142268973	142269144
chr3	142272068	142272240
chr3	142272481	142272857
chr3	142274718	142274981
chr3	142275224	142275417
chr3	142277465	142277618
chr3	142278092	142278283
chr3	142279104	142279296
chr3	142280084	142280263
chr3	142281073	142281951
chr3	142284962	142285103
chr3	142286904	142286996
chr3	142297487	142297546
chr4	106111626	106111643
chr4	106155053	106158594
chr4	106162495	106162587
chr4	106163990	106164084
chr4	106164726	106164935
chr4	106180775	106180926
chr4	106182915	106183005
chr4	106190766	106190904
chr4	106193720	106194075
chr4	106196204	106197673
chr5	1253845	1253946
chr5	1254482	1254620
chr5	1255401	1255526
chr5	1258712	1258774
chr5	1260588	1260715
chr5	1264518	1264707
chr5	1266578	1266650
chr5	1268634	1268748
chr5	1271233	1271319
chr5	1272299	1272395
chr5	1278755	1278911
chr5	1279405	1279585
chr5	1280272	1280453
chr5	1282543	1282739
chr5	1293427	1294781
chr5	1294885	1295104
chr8	54880666	54880672
chr8	54882847	54883023
chr8	54891584	54891731
chr8	54896922	54897077
chr8	54899528	54899585
chr8	54900673	54900819
chr8	54906214	54906315
chr8	54912466	54912610
chr8	54922322	54922329
chr8	54922661	54922670
chr8	54922846	54922854
chr8	54922989	54923052
chr8	54934622	54934685
chr8	55370698	55371005
chr8	55371617	55372552
chr8	57078804	57080062
chr8	57080586	57080828
chr8	57125409	57125468
chr8	57127156	57127226
chr8	57128947	57129117
chr8	57129889	57129991
chr8	71025869	71025878
chr8	71033536	71033626
chr8	71036118	71036317
chr8	71036922	71037100
chr8	71039047	71039282
chr8	71040667	71040745
chr8	71040936	71041215
chr8	71044071	71044237
chr8	71050437	71050567
chr8	71053418	71053634
chr8	71056876	71057083
chr8	71060507	71060718
chr8	71068205	71069475
chr8	71071739	71071887
chr8	71074945	71075089
chr8	71075699	71075801
chr8	71078800	71078989
chr8	71082436	71082614
chr8	71086990	71087094
chr8	71126137	71126310
chr8	71128894	71128980
chr8	74853793	74853840
chr8	74858867	74859055
chr8	74868145	74868289
chr8	74871999	74872003
chr8	80677425	80678006
chr8	80678437	80678498
chr8	80678885	80678967
chr8	80679231	80679327
chr8	80679453	80679529
chr8	80679809	80679898
chr8	87878723	87878811
chr8	87899769	87899839
chr8	87917308	87917422
chr8	87951823	87951982
chr8	88218220	88218366
chr8	88249146	88249340
chr8	88296905	88297043
chr8	88298766	88298899
chr8	88363912	88364022
chr8	88365863	88366104
chr8	88394847	88394852
chr8	88440773	88440841
chr8	88483475	88483535
chr8	88499815	88499929
chr8	88622036	88622082
chr8	88622766	88622806
chr8	88624233	88624288
chr8	90947812	90947840
chr8	90949253	90949303
chr8	90955480	90955594
chr8	90958367	90958523
chr8	90960051	90960120
chr8	90965471	90965919
chr8	90967510	90967783
chr8	90970952	90971082
chr8	90976637	90976735
chr8	90982591	90982785
chr8	90983400	90983518
chr8	90990447	90990551
chr8	90992961	90993121
chr8	90993602	90993751
chr8	90994949	90995083
chr8	90996752	90996789
chr8	92972472	92972745
chr8	92982885	92983076
chr8	92988132	92988201
chr8	92998351	92998553
chr8	92999114	92999200
chr8	93003866	93004117
chr8	93017342	93017525
chr8	93023229	93023319
chr8	93026806	93027048
chr8	93029453	93029591
chr8	93074773	93074937
chr8	93088192	93088280
chr8	93107255	93107399
chr8	93107574	93107695
chr8	93115084	93115112
chr8	100899735	100899846
chr8	100904135	100904249
chr8	103266532	103266742
chr8	103269859	103269945
chr8	103271212	103271357
chr8	103273373	103273487
chr8	103274142	103274298
chr8	103276701	103276786
chr8	103277327	103277506
chr8	103279174	103279235
chr8	103281205	103281336
chr8	103282266	103282411
chr8	103283361	103283473
chr8	103284756	103285000
chr8	103287748	103288056
chr8	103289199	103289420
chr8	103291053	103291436
chr8	103292621	103292695
chr8	103293516	103293747
chr8	103297354	103297566
chr8	103297740	103298009
chr8	103298587	103298845
chr8	103299660	103299792
chr8	103300382	103300494
chr8	103301680	103301804
chr8	103305832	103306072
chr8	103306182	103306343
chr8	103307209	103307760
chr8	103307863	103308010
chr8	103309120	103309212
chr8	103309685	103309834
chr8	103310619	103310717
chr8	103311075	103311199
chr8	103311679	103311775
chr8	103312227	103312379
chr8	103316270	103316397
chr8	103317312	103317523
chr8	103323526	103323724
chr8	103323962	103324117
chr8	103324361	103324713
chr8	103326031	103326144
chr8	103326971	103327081
chr8	103335538	103335723
chr8	103338773	103338891
chr8	103339969	103340124
chr8	103341317	103341627
chr8	103354700	103354912
chr8	103357623	103357773
chr8	103358463	103358623
chr8	103359130	103359320
chr8	103372298	103372418
chr8	103372816	103372893
chr8	103373352	103373434
chr8	103373809	103373854
chr8	103424400	103424462
chr8	117859741	117859930
chr8	117861184	117861268
chr8	117862856	117863006
chr8	117864186	117864335
chr8	117864787	117864947
chr8	117866483	117866707
chr8	117868404	117868527
chr8	117868884	117869010
chr8	117869505	117869712
chr8	117870590	117870697
chr8	117874079	117874179
chr8	117875368	117875498
chr8	117878824	117878968
chr8	118811953	118812136
chr8	118816960	118817132
chr8	118819455	118819616
chr8	118825110	118825200
chr8	118830673	118830769
chr8	118831914	118832033
chr8	118834703	118834836
chr8	118842468	118842588
chr8	118847682	118847790
chr8	118849346	118849440
chr8	119122323	119123285
chr8	128747718	128748060
chr8	128748291	128748869
chr8	128750493	128751265
chr8	128752641	128753201
chr8	134251123	134251362
chr8	134254265	134254317
chr8	134256597	134256633
chr8	134258838	134258906
chr8	134260117	134260169
chr8	134260957	134261014
chr8	134262682	134262786
chr8	134266781	134266838
chr8	134268968	134269106
chr8	134270608	134270669
chr8	134271410	134271473
chr8	134274289	134274410
chr8	134276789	134276895
chr8	134279320	134279365
chr8	134292474	134292510
chr8	134296491	134296572
chr8	134296999	134297139
chr8	134308746	134308750
chr8	134310620	134310635
chr8	134314230	134314263
chr8	145736816	145736938
chr8	145737063	145737172
chr8	145737284	145739096
chr8	145739311	145739909
chr8	145740319	145740841
chr8	145741147	145742148
chr8	145742433	145742574
chr8	145742797	145743168
chr9	2029022	2029247
chr9	2032951	2033081
chr9	2039465	2039947
chr9	2041330	2041404
chr9	2047228	2047485
chr9	2054596	2054723
chr9	2056671	2056845
chr9	2058290	2058464
chr9	2060815	2060986
chr9	2070417	2070471
chr9	2072031	2072067
chr9	2073211	2073342
chr9	2073565	2073623
chr9	2076228	2076329
chr9	2077628	2077776
chr9	2081831	2081995
chr9	2083346	2083413
chr9	2084085	2084196
chr9	2086828	2087071
chr9	2088499	2088613
chr9	2096656	2096764
chr9	2097384	2097471
chr9	2101569	2101616
chr9	2104002	2104169
chr9	2110253	2110417
chr9	2115821	2116049
chr9	2119457	2119535
chr9	2123718	2123937
chr9	2157881	2157890
chr9	2158975	2158978
chr9	2159768	2159909
chr9	2160574	2160619
chr9	2161685	2161903
chr9	2170418	2170472
chr9	2181570	2181676
chr9	2182140	2182242
chr9	2186095	2186228
chr9	2191265	2191429
chr9	2192703	2192736
chr9	5021987	5022213
chr9	5029782	5029906
chr9	5044402	5044520
chr9	5050685	5050831
chr9	5054562	5054884
chr9	5055668	5055788
chr9	5064882	5065040
chr9	5066677	5066789
chr9	5069021	5069208
chr9	5069924	5070052
chr9	5072491	5072626
chr9	5073697	5073785
chr9	5077452	5077580
chr9	5078305	5078444
chr9	5080228	5080380
chr9	5080532	5080683
chr9	5081724	5081861
chr9	5089673	5089863
chr9	5090445	5090570
chr9	5090738	5090911
chr9	5123003	5123121
chr9	5126332	5126446
chr9	5126683	5126788
chr9	21802747	21802949
chr9	21815431	21815518
chr9	21816712	21816771
chr9	21818033	21818201
chr9	21837906	21838009
chr9	21854629	21854869
chr9	21859301	21859424
chr9	21861974	21862010
chr9	21931006	21931195
chr9	21967751	21997323
chr9	22000902	22013312
chr11	85953795	85996462
chr11	108098351	108098615
chr11	108099904	108100055
chr11	108106396	108106569
chr11	108114679	108114845
chr11	108115514	108115753
chr11	108117690	108117854
chr11	108119659	108119829
chr11	108121427	108121799
chr11	108122563	108122758
chr11	108123543	108123639
chr11	108124540	108124766
chr11	108126941	108127067
chr11	108128207	108128333
chr11	108129712	108129802
chr11	108137897	108138069
chr11	108139136	108139336
chr11	108141790	108141873
chr11	108141977	108142133
chr11	108143258	108143334
chr11	108143448	108143579
chr11	108150217	108150335
chr11	108151721	108151895
chr11	108153436	108153606
chr11	108154953	108155200
chr11	108158326	108158442
chr11	108159703	108159830
chr11	108160328	108160528
chr11	108163345	108163520
chr11	108164039	108164204
chr11	108165653	108165786
chr11	108168013	108168109
chr11	108170440	108170612
chr11	108172374	108172516
chr11	108173579	108173756
chr11	108175401	108175579
chr11	108178623	108178711
chr11	108180886	108181042
chr11	108183137	108183225
chr11	108186549	108186840
chr11	108188099	108188248
chr11	108190680	108190785
chr11	108192027	108192147
chr11	108196036	108196271
chr11	108196784	108196952
chr11	108198371	108198485
chr11	108199747	108199965
chr11	108200940	108201148
chr11	108202170	108202284
chr11	108202605	108202764
chr11	108203488	108203627
chr11	108204612	108204695
chr11	108205695	108205836
chr11	108206571	108206688
chr11	108213948	108214098
chr11	108216469	108216635
chr11	108218005	108218092
chr11	108224492	108224607
chr11	108225537	108225601
chr11	108235808	108235945
chr11	108236051	108236232
chr11	119077127	119077322
chr11	119103157	119103405
chr11	119142444	119142591
chr11	119144577	119144734
chr11	119145541	119145663
chr11	119146706	119146844
chr11	119148466	119148554
chr11	119148875	119149007
chr11	119149219	119149423
chr11	119155678	119156276
chr11	119158561	119158656
chr11	119167627	119167744
chr11	119168093	119168191
chr11	119169067	119169250
chr11	119170204	119170488
chr11	119176997	119177068
chr11	119178779	119178784
chr17	7565097	7592856
chr17	29422327	29422387
chr17	29483000	29483144
chr17	29486027	29486111
chr17	29490203	29490394
chr17	29496908	29497015
chr17	29508439	29508507
chr17	29508727	29508803
chr17	29509525	29509914
chr17	29527439	29527613
chr17	29528054	29528177
chr17	29528428	29528503
chr17	29533257	29533389
chr17	29541468	29541603
chr17	29546022	29546148
chr17	29548867	29549005
chr17	29550461	29550585
chr17	29552112	29552268
chr17	29553452	29553702
chr17	29554235	29554309
chr17	29554540	29554624
chr17	29556042	29556483
chr17	29556852	29556992
chr17	29557277	29557400
chr17	29557859	29557943
chr17	29559090	29559207
chr17	29559717	29559899
chr17	29560019	29560231
chr17	29562628	29562790
chr17	29562935	29563039
chr17	29576001	29576137
chr17	29579955	29580018
chr17	29585361	29585520
chr17	29586049	29586147
chr17	29587386	29587533
chr17	29588728	29588875
chr17	29592246	29592357
chr17	29652837	29653270
chr17	29654516	29654857
chr17	29657313	29657516
chr17	29661855	29662049
chr17	29663350	29663491
chr17	29663652	29663932
chr17	29664385	29664600
chr17	29664836	29664898
chr17	29665042	29665157
chr17	29665721	29665823
chr17	29667522	29667663
chr17	29670026	29670153
chr17	29676137	29676269
chr17	29677200	29677336
chr17	29679274	29679432
chr17	29683477	29683600
chr17	29683977	29684108
chr17	29684286	29684387
chr17	29685497	29685640
chr17	29685986	29686033
chr17	29687504	29687726
chr17	29694242	29694296
chr17	29701030	29701170
chr17	30262026	30328059
chr17	40467765	40467818
chr17	40468806	40468919
chr17	40469199	40469242
chr17	40474299	40474512
chr17	40475021	40475161
chr17	40475277	40475372
chr17	40475590	40475643
chr17	40476728	40476864
chr17	40476980	40477079
chr17	40478133	40478217
chr17	40481427	40481809
chr17	40483489	40483549
chr17	40485690	40485783
chr17	40485908	40486067
chr17	40489452	40489604
chr17	40489780	40489875
chr17	40490748	40490830
chr17	40491331	40491427
chr17	40497576	40497675
chr17	40498586	40498731
chr17	40500406	40500534
chr17	58677775	58678247
chr17	58682066	58682109
chr17	58700881	58701110
chr17	58711213	58711338
chr17	58725252	58725443
chr17	58733959	58734322
chr17	58740355	58740910
chr20	57415161	57415941
chr20	57428315	57430388
chr20	57430608	57430700
chr20	57464935	57465790
chr20	57466781	57466920
chr20	57470666	57470739
chr20	57473995	57474040
chr20	57475003	57475007
chr20	57478582	57478846
chr20	57480437	57480535
chr20	57483039	57483098
chr20	57484216	57484271
chr20	57484404	57484634
chr20	57484738	57484859
chr20	57485005	57485136
chr20	57485388	57485456
chr20	57485737	57485881
chrX	76763831	76764107
chrX	76776265	76776394
chrX	76776880	76776976
chrX	76777740	76777866
chrX	76778729	76778879
chrX	76812921	76813116
chrX	76814139	76814317
chrX	76829714	76829823
chrX	76845303	76845410
chrX	76849165	76849319
chrX	76854879	76855049
chrX	76855200	76855289
chrX	76855902	76856033
chrX	76871932	76871979
chrX	76872080	76872198
chrX	76874273	76874449
chrX	76875862	76876000
chrX	76888694	76888872
chrX	76889053	76889200
chrX	76890084	76890194
chrX	76891405	76891547
chrX	76907603	76907843
chrX	76909587	76909690
chrX	76912049	76912143
chrX	76918870	76919047
chrX	76920133	76920267
chrX	76931536	76931793
chrX	76937011	76940085
chrX	76940430	76940498
chrX	76944310	76944420
chrX	76949312	76949426
chrX	76952064	76952192
chrX	76953070	76953123
chrX	76954061	76954117
chrX	76972607	76972720
chrX	77041467	77041487

## Sheet: SUPP_Data_3
Supplementary Table 3.Library Details and Performance Metrics for All Sequencing Libraries in Current Study
Sample ID	Sample Type	Participant ID	Clinical Diagnosis	Tumor Status (Local/Metastatic)	MPNST/NED Status at Collection	Timepoint Order	Total Unique Mapped Reads	Mean On-Target Coverage Unique Depth (×)	Percent Bases ≥300× Unique Coverage (%)	Median Insert Size (bp)	Mean Library Base Quality (Phred)	GC Content (%)	Observed Class (Malignant/Non-malignant)	Combined Multimodal Prediction Score	Off-Target Tumor Fraction (ichorCNA)
Germ001	PDWB Germline	Pat001	NA	NA		NA	8241134	445.6	84.13	280	36.5	51.6	NA	NA	NA
Germ002	PDWB Germline	Pat002	NA	NA		NA	10155631	850.3	88.9	211	35.2	56.3	NA	NA	NA
Germ003	PDWB Germline	Pat003	NA	NA		NA	19313357	2180	92.55	211	35.3	53	NA	NA	NA
Germ004	PDWB Germline	Pat004	NA	NA		NA	1899414	380.73	74.1	188	36.8	51.2	NA	NA	NA
Germ005	PDWB Germline	Pat005	NA	NA		NA	3564591	405.7	75.59	239	36.2	54.1	NA	NA	NA
Germ006	PDWB Germline	Pat006	NA	NA		NA	7350676	795.3	88.22	220	35.4	57.6	NA	NA	NA
Germ007	PDWB Germline	Pat007	NA	NA		NA	9316372	987.8	89.81	229	35.1	56	NA	NA	NA
Germ008	PDWB Germline	Pat008	NA	NA		NA	26502135	357	79.9	307	36.4	43.7	NA	NA	NA
Germ009	PDWB Germline	Pat009	NA	NA		NA	20534680	471.6	85.7	234	36.8	50.3	NA	NA	NA
Germ010	PDWB Germline	Pat010	NA	NA		NA	4496242	683	85.89	215	36.6	53.7	NA	NA	NA
Germ011	PDWB Germline	Pat011	NA	NA		NA	6937460	1024.5	89.54	201	36.7	51.9	NA	NA	NA
Germ012	PDWB Germline	Pat012	NA	NA		NA	8361076	1209.9	91.05	212	36.6	52.5	NA	NA	NA
Germ013	PDWB Germline	Pat013	NA	NA		NA	18410182	2243.6	92.99	203	35	55.7	NA	NA	NA
Germ014	PDWB Germline	Pat014	NA	NA		NA	10934488	1815.6	92.52	189	36.7	52.9	NA	NA	NA
Germ016	PDWB Germline	Pat016	NA	NA		NA	12906439	1950.3	92.99	196	36.4	50.4	NA	NA	NA
Germ017	PDWB Germline	Pat017	NA	NA		NA	17816610	2163.9	92.39	189	36.4	49.9	NA	NA	NA
Germ018	PDWB Germline	Pat018	NA	NA		NA	8097180	1076.9	89.88	204	36.4	51.4	NA	NA	NA
Germ019	PDWB Germline	Pat020	NA	NA		NA	19553371	476.96	88.4	312	36.3	49.6	NA	NA	NA
Germ020	PDWB Germline	Pat021	NA	NA		NA	7821849	1477.8	88.75	163	37	53.1	NA	NA	NA
Germ021	PDWB Germline	Pat022	NA	NA		NA	2549948	412.2	76.35	167	36.8	50.3	NA	NA	NA
Germ022	PDWB Germline	Pat023	NA	NA		NA	6465188	815.9	88.08	220	35.6	57.6	NA	NA	NA
Germ023	PDWB Germline	Pat024	NA	NA		NA	7579039	380.16	79.3	180	35	51.1	NA	NA	NA
Germ024	PDWB Germline	Pat025	NA	NA		NA	5301246	710.5	85.61	201	36.2	54.5	NA	NA	NA
Germ025	PDWB Germline	Pat026	NA	NA		NA	12221174	1165	90.83	233	35.1	52.5	NA	NA	NA
Germ026	PDWB Germline	Pat027	NA	NA		NA	7609490	418.9	79.64	213	36.3	52.4	NA	NA	NA
Germ027	PDWB Germline	Pat028	NA	NA		NA	7946024	442.9	83.22	251	36.8	52	NA	NA	NA
Germ028	PDWB Germline	Pat029	NA	NA		NA	6835736	814.7	85.82	158	37	53.3	NA	NA	NA
Germ029	PDWB Germline	Pat030	NA	NA		NA	6869198	604.6	85.67	169	37.1	53.8	NA	NA	NA
Germ030	PDWB Germline	Pat031	NA	NA		NA	8619916	1117.5	89.89	157	37.1	53.2	NA	NA	NA
Germ031	PDWB Germline	Pat032	NA	NA		NA	5580757	579.8	85.82	212	36	54.9	NA	NA	NA
Germ032	PDWB Germline	Pat033	NA	NA		NA	4486130	372.1	67.42	170	36.6	51.6	NA	NA	NA
Germ033	PDWB Germline	Pat034	NA	NA		NA	5793467	883.5	88.81	199	36.7	52.5	NA	NA	NA
Germ034	PDWB Germline	Pat035	NA	NA		NA	5491064	878.4	88.82	205	36.9	52	NA	NA	NA
Germ035	PDWB Germline	Pat036	NA	NA		NA	5024279	527.4	81.26	198	36.7	52.9	NA	NA	NA
Germ036	PDWB Germline	Pat037	NA	NA		NA	3370774	600.4	86.73	213	37	51.1	NA	NA	NA
Germ037	PDWB Germline	Pat038	NA	NA		NA	15884482	1223.8	91.98	180	36.2	51.6	NA	NA	NA
Germ038	PDWB Germline	Pat039	NA	NA		NA	5334001	451.84	82.7	234	36.8	51.5	NA	NA	NA
Germ039	PDWB Germline	Pat040	NA	NA		NA	4042339	345.96	48.7	168	36.9	54.2	NA	NA	NA
Germ040	PDWB Germline	Pat041	NA	NA		NA	12783695	994.8	89.62	172	36.7	52.6	NA	NA	NA
Germ041	PDWB Germline	Pat042	NA	NA		NA	15005931	1993.5	92.74	207	36.1	51.6	NA	NA	NA
Germ042	PDWB Germline	Pat043	NA	NA		NA	5752860	409.5	79.45	163	37	53	NA	NA	NA
Germ043	PDWB Germline	Pat044	NA	NA		NA	12499077	952.4	89.68	177	36.5	53.4	NA	NA	NA
Germ045	PDWB Germline	Pat046	NA	NA		NA	8425573	489.96	81.9	180	35.1	50.6	NA	NA	NA
Germ046	PDWB Germline	Pat047	NA	NA		NA	22709305	447.68	88.7	298	36.4	44.2	NA	NA	NA
Germ047	PDWB Germline	Pat048	NA	NA		NA	14608463	308.7	62.3	322	35.8	51.1	NA	NA	NA
Germ048	PDWB Germline	Pat049	NA	NA		NA	6193749	699.6	87.81	162	37.2	53.8	NA	NA	NA
Germ049	PDWB Germline	Pat050	NA	NA		NA	7029846	300.9	54.35	161	34.8	51.7	NA	NA	NA
Germ050	PDWB Germline	Pat051	NA	NA		NA	8016202	357.9	70.62	305	36.2	52.2	NA	NA	NA
Germ051	PDWB Germline	Pat052	NA	NA		NA	5059077	575.8	86.99	183	37.1	52.7	NA	NA	NA
Germ052	PDWB Germline	Pat053	NA	NA		NA	9252138	435.3	81.58	171	35	51.4	NA	NA	NA
Germ053	PDWB Germline	Pat054	NA	NA		NA	7727240	310.1	65.08	187	34.9	50.5	NA	NA	NA
Germ054	PDWB Germline	Pat055	NA	NA		NA	6124952	783.3	87.45	156	37.2	53.3	NA	NA	NA
Germ055	PDWB Germline	Pat056	NA	NA		NA	6704576	368.2	75.05	205	34.9	50.9	NA	NA	NA
Germ056	PDWB Germline	Pat057	NA	NA		NA	6626139	473.94	83.1	180	34.9	51	NA	NA	NA
Germ057	PDWB Germline	Pat059	NA	NA		NA	6340754	397.95	50.1	195	34.8	51.4	NA	NA	NA
Germ058	PDWB Germline	Pat061	NA	NA		NA	5686889	325.29	54.5	202	34.6	52.3	NA	NA	NA
Germ059	PDWB Germline	Pat061	NA	NA		NA	4379505	340.9	60.38	165	37.1	52	NA	NA	NA
Germ060	PDWB Germline	Pat062	NA	NA		NA	7684599	312.6	52.04	252	36.8	50.6	NA	NA	NA
Germ061	PDWB Germline	Pat063	NA	NA		NA	9869261	404.28	82.5	276	36.9	49.5	NA	NA	NA
Germ062	PDWB Germline	Pat064	NA	NA		NA	12769397	392.28	76.8	209	36.9	48.9	NA	NA	NA
Germ063	PDWB Germline	Pat065	NA	NA		NA	17224176	394.56	56.8	230	36.9	46.9	NA	NA	NA
Germ064	PDWB Germline	Pat066	NA	NA		NA	14794954	294.9	56.23	242	36.9	47.9	NA	NA	NA
Germ065	PDWB Germline	Pat067	NA	NA		NA	10137396	407.52	29.4	220	37.1	48.3	NA	NA	NA
Germ066	PDWB Germline	Pat068	NA	NA		NA	12360839	422.1	74.6	185	37	49	NA	NA	NA
Germ067	PDWB Germline	Pat069	NA	NA		NA	11837255	441.1	80.9	237	37.1	49.3	NA	NA	NA
Germ068	PDWB Germline	Pat070	NA	NA		NA	3076572	358.02	30.5	151	36.8	53.8	NA	NA	NA
Germ069	PDWB Germline	Pat071	NA	NA		NA	7085415	330.5	63.54	256	36.8	51.5	NA	NA	NA
Germ070	PDWB Germline	Pat072	NA	NA		NA	10305626	388.29	61.2	212	37.1	48.8	NA	NA	NA
Germ071	PDWB Germline	Pat073	NA	NA		NA	22488899	424.7	80.6	187	36.9	45.5	NA	NA	NA
Germ072	PDWB Germline	Pat074	NA	NA		NA	6894928	376.1	73.85	284	36.8	51.4	NA	NA	NA
Germ073	PDWB Germline	Pat075	NA	NA		NA	15063115	420.9	73.2	175	36.7	53.4	NA	NA	NA
Germ074	PDWB Germline	Pat076	NA	NA		NA	20134908	498.1	81.4	204	36.5	52.9	NA	NA	NA
Germ075	PDWB Germline	Pat077	NA	NA		NA	25652335	590.1	88.5	178	36.8	52.1	NA	NA	NA
Germ076	PDWB Germline	Pat078	NA	NA		NA	9238467	315.2	55.8	170	36.3	51.8	NA	NA	NA
Germ077	PDWB Germline	Pat079	NA	NA		NA	12495328	385.4	71.3	160	37.1	49.7	NA	NA	NA
Germ078	PDWB Germline	Pat080	NA	NA		NA	16978476	453.6	77.6	160	36.9	48.9	NA	NA	NA
Germ079	PDWB Germline	Pat081	NA	NA		NA	22341752	537.8	84.7	185	37.2	49.9	NA	NA	NA
Germ080	PDWB Germline	Pat082	NA	NA		NA	10563920	340.1	62.9	181	35.6	52.3	NA	NA	NA
Germ081	PDWB Germline	Pat083	NA	NA		NA	27876945	610.7	89.7	193	36.4	51.5	NA	NA	NA
Germ082	PDWB Germline	Pat084	NA	NA		NA	14102891	405.7	68.5	199	37	51.1	NA	NA	NA
Germ083	PDWB Germline	Pat085	NA	NA		NA	23980127	558.4	85.3	174	35.9	54	NA	NA	NA
Germ084	PDWB Germline	Pat086	NA	NA		NA	18406284	479.3	79.1	191	35.7	50.4	NA	NA	NA
Samp001	Plasma cfDNA	Pat017	MPNST	Metastatic		T1	8377743	911.9	87.61	171	36.3	52.8	1	1	0.0223
Samp002	Plasma cfDNA	Pat084	Healthy	NA		T1	3117834	436.4	83.8	263	37	50.4	0	2.22e-16	0.0394
Samp003	Plasma cfDNA	Pat067	MPNST	Local	NED	T2	10086811	441.76	42.7	197	37.1	51.9	NA	NA	NA
Samp004	Plasma cfDNA	Pat048	Plex	NA		T1	11751850	368.55	72.4	182	37	51.9	0	2.22e-16	0.02
Samp005	Plasma cfDNA	Pat049	Plex	NA		T1	8260965	313.32	74.7	203	37	51.1	0	2.22e-16	0
Samp006	Plasma cfDNA	Pat054	MPNST	Local		T1	7231322	333	53.77	208	36.6	52.4	1	1	0.0082
Samp007	Plasma cfDNA	Pat043	Plex	NA		T1	31898823	383.5	67.6	174	36.8	45.4	0	2.22e-16	0
Samp009	Tumor DNA	Pat046	Tumor	Metastatic		NA	3637244	262.6	39.43	216	37.4	52.3	NA	NA	NA
Samp010	Tumor DNA	Unm003	Tumor	NA		NA	8821029	397.9	74.9	246	37.1	51.5	NA	NA	NA
Samp011	Tumor DNA	Pat014	Tumor	Metastatic		NA	8136456	239	32.49	221	37.2	51.5	NA	NA	NA
Samp012	Tumor DNA	Pat046	Tumor	Metastatic		NA	7206959	214.4	11.86	259	37.2	53	NA	NA	NA
Samp013	Plasma cfDNA	PoN012	Healthy	NA		T1	13965523	655.9	88.21	175	36.1	49.3	NA	NA	NA
Samp014	Plasma cfDNA	PoN003	Healthy	NA		T1	11025219	337.2	48.65	198	35.6	53.2	NA	NA	NA
Samp015	Plasma cfDNA	PoN002	Healthy	NA		T1	8329062	531.1	82.97	177	35.8	52.7	NA	NA	NA
Samp016	Plasma cfDNA	Pat014	MPNST	Metastatic		T1	8041928	634.8	82.39	192	34.6	50.5	1	1	0.0514
Samp017	Plasma cfDNA	Pat007	Plex	NA		T1	9135695	901.4	89.44	178	36.2	52.9	0	2.22e-16	0.0176
Samp018	Plasma cfDNA	Pat005	Plex	NA		T1	3644125	445.32	78.2	181	36.2	51.9	0	2.22e-16	0.0113
Samp019	Plasma cfDNA	Pat003	Plex	NA		T1	6569473	631.1	85.42	185	36.4	53	0	0.999985	0.0396
Samp020	Plasma cfDNA	Pat002	Plex	NA		T1	11059478	1041.5	90.57	175	36.7	52.9	0	4.23e-08	0
Samp021	Plasma cfDNA	Pat080	Healthy	NA		T1	5626584	449.1	81.43	270	36.7	50.5	0	2.22e-16	0.0216
Samp022	Plasma cfDNA	Pat078	Healthy	NA		T1	5671851	528.9	89.05	351	36.6	51.5	0	2.22e-16	0.039
Samp023	Plasma cfDNA	Pat076	Healthy	NA		T1	7952169	1109.8	91.41	191	36.7	52.5	0	2.22e-16	0.034
Samp024	Plasma cfDNA	Pat081	Healthy	NA		T1	4203502	386.82	48.9	246	35.9	50.8	0	2.22e-16	0.0197
Samp025	Plasma cfDNA	Pat066	Plex	NA		T1	9582933	2041.4	91.41	170	37.1	56	0	1	0.0817
Samp026	Plasma cfDNA	Pat071	Plex	NA		T1	4867780	405.8	75.4	190	36.9	50.1	0	2.22e-16	0.0228
Samp027	Plasma cfDNA	Pat057	Plex	NA		T1	6702138	733.1	88.51	183	36.9	52.7	0	2.22e-16	0.0192
Samp028	Plasma cfDNA	Pat029	Plex	NA		T1	6309593	451.4	79.2	190	37	51.2	0	2.22e-16	0.0218
Samp029	Plasma cfDNA	Pat069	Plex	NA		T1	4218249	415.08	67.3	190	36.6	51.5	0	2.22e-16	0
Samp030	Plasma cfDNA	Pat064	Plex	NA		T1	7081810	1461.8	91.01	177	37.3	53.9	0	2.22e-16	0.0314
Samp031	Plasma cfDNA	Pat065	Plex	NA		T1	7323171	1365.8	91.92	180	37.1	53.9	0	2.22e-16	0.0114
Samp032	Plasma cfDNA	Pat041	Plex	NA		T1	3365386	442.72	61.5	178	37.4	52.4	NA	NA	NA
Samp033	Plasma cfDNA	Pat061	MPNST	Metastatic		T1	12873397	820	86.8	172	37	54	1	1	0.0748
Samp034	Plasma cfDNA	Pat024	Plex	NA		T1	24811674	1498.7	92.12	186	36.5	50.8	0	2.22e-16	0
Samp036	Plasma cfDNA	Pat031	Plex	NA		T1	8525463	414	29.4	204	37.1	51.4	0	2.22e-16	0
Samp037	Plasma cfDNA	Pat070	Plex	NA		T1	33823033	1188.5	92.46	181	36.7	45.5	0	2.22e-16	0
Samp038	Plasma cfDNA	Pat046	MPNST	Metastatic	NED	T5	7566958	594.8	76.5	178	37.1	53.4	NA	NA	NA
Samp039	Plasma cfDNA	Pat061	MPNST	Metastatic		T2	12987712	1076.4	88.67	173	37.1	53.3	1	1	0.0748
Samp040	Plasma cfDNA	Pat046	MPNST	Metastatic	NED	T4	8725719	287.2	69.4	189	36.7	52.1	NA	NA	NA
Samp041	Plasma cfDNA	Pat074	Plex	NA		T1	9878625	430.7	79.58	192	36.7	53.1	0	2.22e-16	0.0144
Samp042	Plasma cfDNA	Pat046	MPNST	Metastatic	NED	T3	9184196	617.4	81.65	175	37.2	53.6	NA	NA	NA
Samp043	Plasma cfDNA	Pat046	MPNST	Metastatic	NED	T2	13047191	1049.6	87.43	177	36.9	53.2	NA	NA	NA
Samp045	Tumor DNA	Pat056	Tumor	Local		NA	38251207	353.2	45.75	179	36.9	45.9	NA	NA	NA
Samp046	Tumor DNA	Pat011	Tumor	Metastatic		NA	2646409	105.4	0.27	241	37.2	50.7	NA	NA	NA
Samp047	Tumor DNA	Pat011	Tumor	Metastatic		NA	12117339	263.3	40.47	203	37	50	NA	NA	NA
Samp048	Tumor DNA	Unm001	Tumor	Local		NA	10030888	388.5	81.86	293	37.1	52.8	NA	NA	NA
Samp049	Tumor DNA	Pat056	Tumor	Local		NA	7975562	214.6	17.33	262	37.1	52.7	NA	NA	NA
Samp050	Plasma cfDNA	PoN009	Healthy	NA		T1	25043203	1232.2	90.1	166	36	46.8	NA	NA	NA
Samp051	Plasma cfDNA	PoN008	Healthy	NA		T1	14401375	668.6	86.95	171	35.9	49.4	NA	NA	NA
Samp052	Plasma cfDNA	PoN007	Healthy	NA		T1	21305637	1956.3	92.95	174	36.2	50.2	NA	NA	NA
Samp053	Plasma cfDNA	PoN005	Healthy	NA		T1	3324175	434	58.67	170	36.4	49.5	NA	NA	NA
Samp054	Plasma cfDNA	Pat042	MPNST	Metastatic		T1	20015753	1814.6	92.96	184	36.4	50.7	1	1	0.0217
Samp055	Plasma cfDNA	Pat023	Plex	NA		T1	20323106	1686.8	93.76	242	35.7	48.9	0	2.22e-16	0.0323
Samp056	Plasma cfDNA	Pat018	MPNST	Metastatic		T1	8670312	690	80.24	172	36.1	53.1	1	1	0.0394
Samp057	Plasma cfDNA	Pat011	MPNST	Metastatic		T1	27910259	2197.7	90.54	171	36.7	46.5	1	1	0
Samp058	Plasma cfDNA	Pat075	Healthy	NA		T1	962457	352.62	42.1	342	35.5	47.2	0	2.22e-16	0.0242
Samp059	Plasma cfDNA	Pat079	Healthy	NA		T1	2267973	354.27	68.4	195	36.2	50.7	0	2.22e-16	0.0129
Samp060	Plasma cfDNA	Pat085	Healthy	NA		T1	5128397	422.4	78.36	293	36.8	51.2	0	2.22e-16	0.0316
Samp061	Plasma cfDNA	Pat067	MPNST	Local		T1	7919591	1400.3	90.92	174	36.8	56	0	2.22e-16	0.0734
Samp062	Plasma cfDNA	Pat027	MPNST	Metastatic	NED	T1	8955833	1918.4	90.85	168	37.1	55.9	NA	NA	NA
Samp063	Plasma cfDNA	Pat027	MPNST	Metastatic		T2	12726047	2302	92.44	169	36.7	56.5	1	1	0.0538
Samp064	Plasma cfDNA	Pat027	MPNST	Metastatic		T3	11750341	2376.9	92.74	174	36.9	55.7	1	0.99996	0.0823
Samp065	Plasma cfDNA	Pat047	Plex	NA		T1	2987895	510.4	82.42	188	36.9	50.1	0	2.22e-16	0.0217
Samp066	Plasma cfDNA	Pat009	Plex	NA		T1	4757129	396.2	73.96	183	37.1	50.6	0	1	0.0149
Samp067	Plasma cfDNA	Pat001	Plex	NA		T1	8394616	1304.9	92.62	184	36.9	53.5	0	2.22e-16	0.0286
Samp069	Plasma cfDNA	Pat044	Plex	NA		T1	7507880	1479	91.32	175	37.1	54.3	0	2.22e-16	0
Samp070	Plasma cfDNA	Pat039	Plex	NA		T1	8358814	1645.4	92.11	173	37.2	54.9	0	2.22e-16	0.0302
Samp071	Plasma cfDNA	Pat004	Plex	NA		T1	5207143	490.32	86.3	180	37.3	52.5	NA	NA	NA
Samp073	Plasma cfDNA	Pat046	MPNST	Local		T1	10195352	374.1	46.79	186	37.1	44.1	NA	NA	NA
Samp074	Plasma cfDNA	Pat056	MPNST	Metastatic	NED	T1	13029984	625	84.28	190	36.9	53.4	NA	NA	NA
Samp075	Plasma cfDNA	Pat052	Plex	NA		T1	23590851	766.8	81.94	201	36.6	46.6	0	2.22e-16	0
Samp076	Plasma cfDNA	Pat068	Plex	NA		T1	4853354	315.6	33.1	199	37.1	53.2	0	2.22e-16	0
Samp077	Plasma cfDNA	Pat030	Plex	NA		T1	13146083	374.64	66.7	193	36.8	50.5	0	2.22e-16	0
Samp078	Plasma cfDNA	Pat072	Plex	NA		T1	10108662	337.47	63.2	210	37	51	0	2.22e-16	0
Samp079	Plasma cfDNA	Pat056	MPNST	Metastatic		T2	13399965	954	88.49	174	36.9	52.9	1	1	0.1048
Samp080	Tumor DNA	Pat061	Tumor	Local		NA	5844889	235.3	27.05	248	37.3	50.4	NA	NA	NA
Samp081	Tumor DNA	Pat037	Tumor	Metastatic		NA	6311034	180.5	3.97	211	37.2	51.2	NA	NA	NA
Samp082	Tumor DNA	Unm002	Tumor	Local		NA	1645354	107	4.63	256	37.3	53.2	NA	NA	NA
Samp083	Tumor DNA	Pat040	Tumor	Local		NA	4816831	193	15.98	271	37.1	55.6	NA	NA	NA
Samp084	Tumor DNA	Pat020	Tumor	Local		NA	11482771	614.3	88.18	290	36.9	54.2	NA	NA	NA
Samp085	Tumor DNA	Pat055	Tumor	Local		NA	2656686	105.8	2.4	245	37.3	52.7	NA	NA	NA
Samp086	Plasma cfDNA	PoN010	Healthy	NA		T1	23191224	1653.8	91.94	175	36.3	45.4	NA	NA	NA
Samp087	Plasma cfDNA	PoN004	Healthy	NA		T1	12574811	466.74	87	175	36.3	47	NA	NA	NA
Samp088	Plasma cfDNA	Pat037	MPNST	Metastatic		T1	23783789	2432.1	93.73	176	36.5	50.4	1	1	0.0319
Samp089	Plasma cfDNA	Pat025	Plex	NA		T1	27519905	1923	93.39	170	36.6	46.5	0	2.22e-16	0.01
Samp090	Plasma cfDNA	Pat021	MPNST	Metastatic		T1	11730204	1396.8	92.74	176	36.7	51.2	1	1	0
Samp091	Plasma cfDNA	Pat012	MPNST	Metastatic		T1	8041974	584.3	68.3	181	35.5	54.4	1	2.22e-16	0.0586
Samp092	Plasma cfDNA	Pat077	Healthy	NA		T1	4647442	390	78.31	190	36.8	50.9	0	2.22e-16	0.0158
Samp093	Plasma cfDNA	Pat086	Healthy	NA		T1	8581671	983.4	94.87	349	36.4	53	0	2.22e-16	0.0446
Samp094	Plasma cfDNA	Pat020	MPNST	Local		T1	1697944	417	63.47	167	37.2	52.5	1	1	0.098
Samp095	Plasma cfDNA	Pat020	MPNST	Local		T2	15266361	3038.8	92.66	167	36.8	56.6	1	1	0.0774
Samp096	Plasma cfDNA	Pat020	MPNST	Local		T3	10789435	2185.7	91.85	168	36.8	56.1	1	1	0.0788
Samp098	Plasma cfDNA	Pat040	MPNST	Local		T3	12113210	2486.7	91.94	169	36.9	55.7	1	1	0.0855
Samp099	Plasma cfDNA	Pat055	MPNST	Local	NED	T1	2854057	377.37	58.9	194	36.3	50.4	NA	NA	NA
Samp100	Plasma cfDNA	Pat040	MPNST	Local		T1	6072640	1127.3	86.84	174	37.2	53.9	1	2.22e-16	0.0121
Samp101	Plasma cfDNA	Pat020	MPNST	Local	NED	T4	5693510	1029.9	88.66	172	37.3	54.1	NA	NA	NA
Samp102	Plasma cfDNA	Pat020	MPNST	Local	NED	T5	10377813	2193.4	92.12	171	37.1	55	NA	NA	NA
Samp103	Plasma cfDNA	Pat063	Plex	NA		T1	6825701	1053.9	89.5	177	36.9	53.4	0	2.22e-16	0.0333
Samp104	Plasma cfDNA	Pat038	Plex	NA		T1	7657511	626.2	81.54	171	37.1	53.8	0	2.22e-16	0.0112
Samp105	Plasma cfDNA	Pat073	Plex	NA		T1	11080624	449.82	84.9	202	36.9	51.3	0	2.22e-16	0.0276
Samp106	Plasma cfDNA	Pat040	MPNST	Local	NED	T2	8840023	322.56	48.7	202	37.1	50.5	NA	NA	NA
Samp107	Plasma cfDNA	Pat008	Plex	NA		T1	12457493	437.04	80.3	200	36.9	52.2	0	2.22e-16	0.0141
Samp108	Plasma cfDNA	Pat028	Plex	NA		T1	9383500	290.64	55.8	173	36.9	51.8	0	2.22e-16	0
Samp109	Plasma cfDNA	Pat036	MPNST	Local		T1	9759208	321.9	65.18	169	37.1	51.3	1	1	0.0608
Samp110	Tumor DNA	Pat035	Tumor	Local		NA	1124589	70.1	1.5	200	37.2	50.5	NA	NA	NA
Samp111	Tumor DNA	Pat050	Tumor	Local		NA	15116446	741.1	78.71	217	36.9	52.7	NA	NA	NA
Samp112	Tumor DNA	Pat060	Tumor	Metastatic		NA	4794561	229	30.68	249	37.3	52	NA	NA	NA
Samp113	Tumor DNA	Pat060	Tumor	Metastatic		NA	5931115	387.8	81.57	232	37.5	51.8	NA	NA	NA
Samp114	Plasma cfDNA	PoN011	Healthy	NA		T1	16870236	1023.7	90.18	172	35.9	51.7	NA	NA	NA
Samp115	Plasma cfDNA	Pat035	MPNST	Local		T1	20657443	1926.8	93.82	179	36.7	50.8	1	1	0.0157
Samp116	Plasma cfDNA	Pat022	MPNST	Metastatic		T1	32566579	3517.9	92.9	168	36.3	50.5	1	1	0.1899
Samp117	Plasma cfDNA	Pat016	MPNST	Metastatic		T1	18333232	1961.5	90.05	168	36.6	54.1	1	1	0.0596
Samp118	Plasma cfDNA	Pat013	Plex	NA		T1	16060368	1266.3	92.29	188	35.7	51.6	0	2.22e-16	0.0274
Samp119	Plasma cfDNA	Pat083	Healthy	NA		T1	3641857	315.84	50.2	251	35.7	51.7	0	2.22e-16	0.0207
Samp120	Plasma cfDNA	Pat082	Healthy	NA		T1	3274600	362.7	63.8	343	36	51.5	0	2.22e-16	0.0253
Samp121	Plasma cfDNA	Pat060	MPNST	Metastatic	NED	T2	8007613	1464	89.39	168	37	55.7	NA	NA	NA
Samp122	Plasma cfDNA	Pat051	Plex	NA		T1	3498499	329.07	33.6	187	36.6	50.8	0	2.22e-16	0.0159
Samp124	Plasma cfDNA	Pat050	MPNST	Local		T3	8537985	1673	90.69	170	37.3	55.1	1	1	0.028
Samp125	Plasma cfDNA	Pat062	Plex	NA		T1	9351428	1918.7	93.43	176	37.1	54.8	0	2.22e-16	0.0219
Samp126	Plasma cfDNA	Pat050	MPNST	Local		T1	10223029	1902.9	87.42	174	37	54.7	1	1	0.0294
Samp127	Plasma cfDNA	Pat060	MPNST	Metastatic		T1	7160039	644.9	76.56	175	36.9	53.9	1	1	0.018
Samp128	Plasma cfDNA	Pat053	MPNST	Local		T1	13544335	473.1	50.75	181	37	48.2	1	2.22e-16	0
Samp129	Plasma cfDNA	Pat050	MPNST	Local	NED	T2	9215049	350.49	77.3	186	37.1	51.5	NA	NA	NA
Samp130	Plasma cfDNA	PoN006	Healthy	NA		T1	7549432	468.32	79.8	173	35.8	51.2	NA	NA	NA
Samp131	Plasma cfDNA	PoN001	Healthy	NA		T1	9875692	537.1	83.01	175	36	46.9	NA	NA	NA
Samp132	Plasma cfDNA	Pat033	Plex	NA		T1	17914803	2767.4	95.08	179	36.9	52.5	1	8.83e-12	0.0624
Samp133	Plasma cfDNA	Pat032	Plex	NA		T1	18127915	2692.6	94.86	177	36.9	52.4	0	9.39e-09	0.0423
Samp134	Plasma cfDNA	Pat026	Plex	NA		T1	16393566	1047.6	91.93	184	36.7	51.6	0	2.22e-16	0.0205
Samp135	Plasma cfDNA	Pat010	Plex	NA		T1	18747163	2109	94.13	199	36.4	54	0	2.22e-16	0.0322
Samp136	Plasma cfDNA	Pat006	Plex	NA		T1	10837434	832.9	90.29	317	35.4	53.1	0	2.22e-16	0.0307
Samp137	Plasma cfDNA	Pat059	MPNST	Local		T1	10921056	2251.5	91.5	168	36.9	56.1	1	2.22e-16	0.0799
Samp138	Plasma cfDNA	Pat059	MPNST	Local	NED	T2	11338457	1089.2	88.96	171	37.1	54	NA	NA	NA
Samp139	Tumor DNA	Pat034	Tumor	Metastatic		NA	11810384	698.2	89.71	290	37	54.7	NA	NA	NA
Samp140	Plasma cfDNA	Pat034	MPNST	Metastatic		T1	31920697	2022.7	93.17	171	36.6	46.4	1	0.134833	0.0085
a. NA indicates Not Applicable. Used only where a value cannot exist or not assessed for the given sample or cohort.
b. Timepoint Order reflects the chronological order of sample collections for each participant. "NED" refers to no clinically evident malignancy at the timepoint.
c. Tumor Status (Local/Metastatic) refers to tumor status at the time of sampling, if relevant.
d. Observed Class is the clinical classification at time of collection. Non-malignant includes both healthy and plexiform neurofibroma samples.
e. Combined Multimodal Prediction Score is the output from the cfDNA-based machine learning classifier.
f. Off-Target Tumor Fraction (ichorCNA) is the fraction of circulating tumor DNA estimated by ichorCNA.
g. All other abbreviations are defined in the main text or Methods.
